# Supplementary material
Source: publisher site journal article supplement (http://www.spandidos-publications.com/2763/downloadSupplementary)
Supplement: Supplementary file 1 [file downloadSupplementary]

## Sheet: TargetScan7
Table SI. Potential miR-491 targets.
Target gene	Representative transcript	Gene name	3P-seq tags + 5	Conserved sites total	Conserved 8mer sites	Conserved 7mer-m8 sites	Conserved 7mer-A1 sites	Poorly conserved sites total	Poorly conserved 8mer sites	Poorly conserved 7mer-m8 sites	Poorly conserved 7mer-A1 sites	6mer sites	Representative miRNA	Cumulative weighted context++ score	Total context++ score
FAM222B	ENST00000582266.1	family with sequence similarity 222, member B	100	1	1	0	0	5	1	2	2	0	hsa-miR-491-5p	-1.57	-1.61
SIX5	ENST00000560168.1	SIX homeobox 5	47	2	1	1	0	4	0	2	2	2	hsa-miR-491-5p	-1.29	-1.29
SHISA6	ENST00000441885.3	shisa family member 6	5	1	0	1	0	6	1	2	3	0	hsa-miR-491-5p	-1.06	-1.06
FOXP4	ENST00000373063.3	forkhead box P4	228	2	0	1	1	5	2	3	0	4	hsa-miR-491-5p	-0.98	-1.2
ELOVL1	ENST00000372458.3	ELOVL fatty acid elongase 1	188	1	1	0	0	2	0	0	2	0	hsa-miR-491-5p	-0.83	-0.83
DERL3	ENST00000404056.1	derlin 3	129	1	1	0	0	3	0	2	1	5	hsa-miR-491-5p	-0.82	-1.04
NOVA2	ENST00000263257.5	neuro-oncological ventral antigen 2	7	1	0	1	0	4	1	2	1	13	hsa-miR-491-5p	-0.8	-1.37
FBXO41	ENST00000295133.5	F-box protein 41	175	1	0	0	1	3	1	2	0	4	hsa-miR-491-5p	-0.79	-0.81
TAF10	ENST00000299424.4	TAF10 RNA polymerase II, TATA box binding protein (TBP)-associated factor, 30kDa	2698	1	1	0	0	0	0	0	0	0	hsa-miR-491-5p	-0.78	-0.78
ZNF703	ENST00000331569.4	zinc finger protein 703	1557	1	0	1	0	4	0	4	0	1	hsa-miR-491-5p	-0.76	-1.02
C17orf74	ENST00000574034.1	chromosome 17 open reading frame 74	8	1	1	0	0	2	0	2	0	0	hsa-miR-491-5p	-0.72	-0.72
SLC39A13	ENST00000524928.1	solute carrier family 39 (zinc transporter), member 13	845	1	1	0	0	2	0	1	1	1	hsa-miR-491-5p	-0.72	-0.72
RABIF	ENST00000367262.3	RAB interacting factor	948	1	1	0	0	0	0	0	0	0	hsa-miR-491-5p	-0.69	-0.69
NFIB	ENST00000397575.3	nuclear factor I/B	1149	1	1	0	0	2	0	1	1	3	hsa-miR-491-5p	-0.68	-1.05
MS4A15	ENST00000337911.4	membrane-spanning 4-domains, subfamily A, member 15	5	1	0	1	0	1	0	1	0	2	hsa-miR-491-5p	-0.64	-0.64
SYNGAP1	ENST00000418600.2	synaptic Ras GTPase activating protein 1	15	1	0	1	0	4	1	3	0	4	hsa-miR-491-5p	-0.64	-0.64
SPRED3	ENST00000587013.1	sprouty-related, EVH1 domain containing 3	42	1	0	1	0	4	0	1	3	3	hsa-miR-491-5p	-0.63	-0.78
SEMA4G	ENST00000210633.3	sema domain, immunoglobulin domain (Ig), transmembrane domain (TM) and short cytoplasmic domain, (semaphorin) 4G	1015	1	1	0	0	3	0	2	1	4	hsa-miR-491-5p	-0.63	-1.25
ZMYM4	ENST00000314607.6	zinc finger, MYM-type 4	280	1	1	0	0	2	0	1	1	0	hsa-miR-491-5p	-0.63	-0.83
TCF7	ENST00000518915.1	transcription factor 7 (T-cell specific, HMG-box)	883	1	1	0	0	1	0	0	1	1	hsa-miR-491-5p	-0.62	-0.63
DNAJB5	ENST00000545841.1	DnaJ (Hsp40) homolog, subfamily B, member 5	379	1	1	0	0	1	0	1	0	2	hsa-miR-491-5p	-0.61	-0.61
NFASC	ENST00000401399.1	neurofascin	10	1	0	1	0	2	0	1	1	3	hsa-miR-491-5p	-0.61	-0.61
ELAVL3	ENST00000359227.3	ELAV like neuron-specific RNA binding protein 3	5	1	1	0	0	5	0	3	2	10	hsa-miR-491-5p	-0.61	-0.61
TSKU	ENST00000333090.4	tsukushi, small leucine rich proteoglycan	293	1	0	1	0	7	0	4	3	4	hsa-miR-491-5p	-0.6	-1.36
TMEM35	ENST00000372930.4	transmembrane protein 35	372	1	1	0	0	0	0	0	0	1	hsa-miR-491-5p	-0.59	-0.59
ASB13	ENST00000357700.6	ankyrin repeat and SOCS box containing 13	1578	1	1	0	0	1	0	1	0	0	hsa-miR-491-5p	-0.58	-0.58
LYNX1	ENST00000395192.2	Ly6/neurotoxin 1	5	1	0	0	1	1	0	0	1	5	hsa-miR-491-5p	-0.58	-0.58
PEA15	ENST00000360472.4	phosphoprotein enriched in astrocytes 15	5239	1	0	1	0	2	0	2	0	2	hsa-miR-491-5p	-0.54	-0.54
CREB3L2	ENST00000330387.6	cAMP responsive element binding protein 3-like 2	2872	1	1	0	0	2	0	1	1	2	hsa-miR-491-5p	-0.54	-0.57
GATAD2B	ENST00000368655.4	GATA zinc finger domain containing 2B	48	1	0	1	0	5	3	2	0	6	hsa-miR-491-5p	-0.54	-1.43
B4GALT5	ENST00000371711.4	UDP-Gal:betaGlcNAc beta 1,4- galactosyltransferase, polypeptide 5	1000	1	1	0	0	1	0	0	1	3	hsa-miR-491-5p	-0.53	-0.53
NPFFR1	ENST00000277942.6	neuropeptide FF receptor 1	5	1	0	0	1	2	0	1	1	1	hsa-miR-491-5p	-0.53	-0.53
LDLRAD2	ENST00000344642.2	low density lipoprotein receptor class A domain containing 2	5	1	0	1	0	2	0	0	2	5	hsa-miR-491-5p	-0.53	-0.53
SYT2	ENST00000367267.1	synaptotagmin II	5	1	1	0	0	1	0	0	1	2	hsa-miR-491-5p	-0.53	-0.53
FNBP1	ENST00000355681.3	formin binding protein 1	165	1	1	0	0	2	1	0	1	0	hsa-miR-491-5p	-0.52	-0.77
VWA1	ENST00000338660.5	von Willebrand factor A domain containing 1	145	1	0	1	0	3	1	2	0	4	hsa-miR-491-5p	-0.52	-0.89
RPL18	ENST00000549273.1	ribosomal protein L18	4686	1	1	0	0	0	0	0	0	0	hsa-miR-491-5p	-0.51	-0.51
LRFN1	ENST00000248668.4	leucine rich repeat and fibronectin type III domain containing 1	82	1	1	0	0	0	0	0	0	2	hsa-miR-491-5p	-0.51	-0.51
PEG10	ENST00000482108.1	paternally expressed 10	8778	1	1	0	0	1	0	0	1	0	hsa-miR-491-5p	-0.5	-0.5
HAP1	ENST00000393939.2	huntingtin-associated protein 1	5	1	0	0	1	2	0	0	2	0	hsa-miR-491-5p	-0.49	-0.49
PLA2G15	ENST00000566188.1	phospholipase A2, group XV	2670	1	1	0	0	1	0	0	1	1	hsa-miR-491-5p	-0.49	-0.49
USP13	ENST00000263966.3	ubiquitin specific peptidase 13 (isopeptidase T-3)	379	1	0	1	0	2	1	0	1	3	hsa-miR-491-5p	-0.48	-0.59
CYP26B1	ENST00000001146.2	cytochrome P450, family 26, subfamily B, polypeptide 1	1315	1	0	0	1	1	0	0	1	3	hsa-miR-491-5p	-0.47	-0.47
PER2	ENST00000254658.3	period circadian clock 2	106	1	0	0	1	3	0	2	1	3	hsa-miR-491-5p	-0.47	-0.47
CNN2	ENST00000263097.4	calponin 2	699	1	1	0	0	0	0	0	0	1	hsa-miR-491-5p	-0.47	-0.47
AMD1	ENST00000368885.3	adenosylmethionine decarboxylase 1	725	1	1	0	0	0	0	0	0	0	hsa-miR-491-5p	-0.46	-0.46
BCL6B	ENST00000293805.5	B-cell CLL/lymphoma 6, member B	7	1	1	0	0	0	0	0	0	2	hsa-miR-491-5p	-0.46	-0.46
SHANK3	ENST00000414786.2	SH3 and multiple ankyrin repeat domains 3	5	1	0	0	1	2	0	0	2	5	hsa-miR-491-5p	-0.46	-0.46
NFKBID	ENST00000396901.1	nuclear factor of kappa light polypeptide gene enhancer in B-cells inhibitor, delta	40	1	0	1	0	2	1	1	0	1	hsa-miR-491-5p	-0.45	-0.99
ZBTB4	ENST00000380599.4	zinc finger and BTB domain containing 4	1039	1	1	0	0	1	0	1	0	2	hsa-miR-491-5p	-0.45	-0.45
COL26A1	ENST00000313669.7	collagen, type XXVI, alpha 1	223	2	0	2	0	1	0	1	0	2	hsa-miR-491-5p	-0.44	-0.55
ELAVL4	ENST00000371824.1	ELAV like neuron-specific RNA binding protein 4	5	1	1	0	0	1	0	0	1	0	hsa-miR-491-5p	-0.43	-0.43
GIPC1	ENST00000393029.3	GIPC PDZ domain containing family, member 1	2934	1	0	1	0	1	0	1	0	0	hsa-miR-491-5p	-0.43	-0.43
DGCR2	ENST00000545799.1	DiGeorge syndrome critical region gene 2	1754	1	0	1	0	1	0	0	1	3	hsa-miR-491-5p	-0.42	-0.42
KAT8	ENST00000448516.2	K(lysine) acetyltransferase 8	2490	1	1	0	0	0	0	0	0	0	hsa-miR-491-5p	-0.41	-0.41
TMEM132B	ENST00000299308.3	transmembrane protein 132B	5	1	0	0	1	1	1	0	0	0	hsa-miR-491-5p	-0.41	-0.41
ARHGAP19-SLIT1	ENST00000453547.2	ARHGAP19-SLIT1 readthrough (NMD candidate)	15	1	1	0	0	2	0	2	0	4	hsa-miR-491-5p	-0.41	-0.41
ZBTB8A	ENST00000316459.4	zinc finger and BTB domain containing 8A	287	1	1	0	0	1	0	0	1	0	hsa-miR-491-5p	-0.4	-0.5
DMPK	ENST00000354227.5	dystrophia myotonica-protein kinase	409	1	0	1	0	0	0	0	0	2	hsa-miR-491-5p	-0.4	-0.41
CTIF	ENST00000256413.3	CBP80/20-dependent translation initiation factor	154	1	0	1	0	3	0	1	2	1	hsa-miR-491-5p	-0.4	-0.64
DOK4	ENST00000566936.1	docking protein 4	183	1	1	0	0	1	0	1	0	0	hsa-miR-491-5p	-0.39	-0.58
SIT1	ENST00000259608.3	signaling threshold regulating transmembrane adaptor 1	7	1	0	1	0	1	0	0	1	3	hsa-miR-491-5p	-0.39	-0.66
NIPAL2	ENST00000341166.3	NIPA-like domain containing 2	7	1	1	0	0	1	0	0	1	1	hsa-miR-491-5p	-0.39	-0.39
SP2	ENST00000376741.4	Sp2 transcription factor	779	1	1	0	0	2	0	0	2	3	hsa-miR-491-5p	-0.39	-0.68
CCDC97	ENST00000269967.3	coiled-coil domain containing 97	85	1	0	0	1	1	0	0	1	4	hsa-miR-491-5p	-0.38	-0.58
CLIP2	ENST00000223398.6	CAP-GLY domain containing linker protein 2	2111	1	0	1	0	1	1	0	0	3	hsa-miR-491-5p	-0.38	-0.38
OTOP3	ENST00000328801.4	otopetrin 3	5	1	1	0	0	0	0	0	0	0	hsa-miR-491-5p	-0.38	-0.38
MARCKS	ENST00000368635.4	myristoylated alanine-rich protein kinase C substrate	188	1	1	0	0	0	0	0	0	0	hsa-miR-491-5p	-0.38	-0.38
ZC3H7B	ENST00000352645.4	zinc finger CCCH-type containing 7B	888	1	0	1	0	3	0	1	2	4	hsa-miR-491-5p	-0.38	-0.38
C2CD2L	ENST00000336702.3	C2CD2-like	13	2	0	2	0	1	0	1	0	0	hsa-miR-491-5p	-0.38	-0.38
MBD6	ENST00000355673.3	methyl-CpG binding domain protein 6	24	1	0	1	0	1	0	1	0	1	hsa-miR-491-5p	-0.38	-0.38
HNRNPA0	ENST00000314940.4	heterogeneous nuclear ribonucleoprotein A0	22668	1	0	0	1	0	0	0	0	1	hsa-miR-491-5p	-0.37	-0.37
CELF3	ENST00000290585.4	CUGBP, Elav-like family member 3	5	1	1	0	0	1	0	1	0	2	hsa-miR-491-5p	-0.36	-0.58
EIF5B	ENST00000289371.6	eukaryotic translation initiation factor 5B	188	1	1	0	0	0	0	0	0	0	hsa-miR-491-5p	-0.36	-0.36
PBX2	ENST00000375050.4	pre-B-cell leukemia homeobox 2	98	1	0	1	0	1	0	1	0	2	hsa-miR-491-5p	-0.36	-0.36
TEAD3	ENST00000402886.3	TEA domain family member 3	137	1	0	1	0	1	0	1	0	2	hsa-miR-491-5p	-0.35	-0.35
MOG	ENST00000376902.3	myelin oligodendrocyte glycoprotein	5	1	0	1	0	0	0	0	0	0	hsa-miR-491-5p	-0.35	-0.35
SCIMP	ENST00000574081.1	SLP adaptor and CSK interacting membrane protein	5	1	0	1	0	3	1	1	1	1	hsa-miR-491-5p	-0.35	-1.33
ERGIC1	ENST00000393784.3	endoplasmic reticulum-golgi intermediate compartment (ERGIC) 1	4614	1	0	1	0	0	0	0	0	3	hsa-miR-491-5p	-0.33	-0.37
PORCN	ENST00000355961.4	porcupine homolog (Drosophila)	35	1	0	1	0	0	0	0	0	1	hsa-miR-491-5p	-0.33	-0.33
KDM4B	ENST00000159111.4	lysine (K)-specific demethylase 4B	547	1	0	1	0	2	0	2	0	1	hsa-miR-491-5p	-0.33	-0.34
NRG2	ENST00000394770.1	neuregulin 2	9	1	1	0	0	3	0	2	1	2	hsa-miR-491-5p	-0.33	-0.6
CTD-2545M3.6	ENST00000599632.1		10	1	1	0	0	4	0	3	1	1	hsa-miR-491-5p	-0.33	-1.2
OTUD7B	ENST00000369135.4	OTU domain containing 7B	299	1	1	0	0	0	0	0	0	1	hsa-miR-491-5p	-0.32	-0.38
CSRNP2	ENST00000228515.1	cysteine-serine-rich nuclear protein 2	104	1	1	0	0	0	0	0	0	0	hsa-miR-491-5p	-0.32	-0.37
CCDC113	ENST00000443128.2	coiled-coil domain containing 113	29	1	0	1	0	1	0	0	1	3	hsa-miR-491-5p	-0.32	-0.58
USP20	ENST00000315480.4	ubiquitin specific peptidase 20	66	1	1	0	0	3	0	0	3	3	hsa-miR-491-5p	-0.32	-0.33
SAP30BP	ENST00000584667.1	SAP30 binding protein	867	1	0	0	1	1	0	1	0	2	hsa-miR-491-5p	-0.31	-0.45
SMARCD1	ENST00000394963.4	SWI/SNF related, matrix associated, actin dependent regulator of chromatin, subfamily d, member 1	952	1	0	1	0	1	0	0	1	1	hsa-miR-491-5p	-0.31	-0.32
IGF2BP1	ENST00000290341.3	insulin-like growth factor 2 mRNA binding protein 1	460	1	0	1	0	3	0	3	0	3	hsa-miR-491-5p	-0.31	-0.37
MYT1L	ENST00000399161.2	myelin transcription factor 1-like	5	1	1	0	0	1	0	1	0	0	hsa-miR-491-5p	-0.3	-0.3
STXBP1	ENST00000373302.3	syntaxin binding protein 1	295	1	0	0	1	0	0	0	0	0	hsa-miR-491-5p	-0.3	-0.3
SHOC2	ENST00000369452.4	soc-2 suppressor of clear homolog (C. elegans)	437	1	1	0	0	0	0	0	0	0	hsa-miR-491-5p	-0.3	-0.3
NLE1	ENST00000586869.1	notchless homolog 1 (Drosophila)	526	1	0	1	0	3	0	3	0	3	hsa-miR-491-5p	-0.3	-0.67
IQGAP3	ENST00000361170.2	IQ motif containing GTPase activating protein 3	7	1	1	0	0	0	0	0	0	0	hsa-miR-491-5p	-0.29	-0.29
KIAA1614	ENST00000367588.4	KIAA1614	5	1	0	1	0	4	0	2	2	1	hsa-miR-491-5p	-0.29	-0.29
VASP	ENST00000245932.6	vasodilator-stimulated phosphoprotein	1627	1	0	0	1	0	0	0	0	1	hsa-miR-491-5p	-0.29	-0.29
C17orf85	ENST00000158149.3	chromosome 17 open reading frame 85	718	1	0	0	1	3	1	1	1	0	hsa-miR-491-5p	-0.29	-0.62
FADS2	ENST00000257261.6	fatty acid desaturase 2	285	1	0	1	0	0	0	0	0	0	hsa-miR-491-5p	-0.28	-0.3
PAIP2B	ENST00000244221.8	poly(A) binding protein interacting protein 2B	42	1	1	0	0	0	0	0	0	1	hsa-miR-491-5p	-0.28	-0.3
P2RX6	ENST00000402329.3	purinergic receptor P2X, ligand-gated ion channel, 6	10	1	0	1	0	0	0	0	0	2	hsa-miR-491-5p	-0.28	-0.28
APH1A	ENST00000360244.4	APH1A gamma secretase subunit	475	1	0	1	0	0	0	0	0	1	hsa-miR-491-5p	-0.28	-0.28
RASL10B	ENST00000268864.3	RAS-like, family 10, member B	1495	1	1	0	0	0	0	0	0	1	hsa-miR-491-5p	-0.28	-0.28
KAT7	ENST00000259021.4	K(lysine) acetyltransferase 7	48	1	1	0	0	1	0	0	1	0	hsa-miR-491-5p	-0.27	-0.3
VPS13B	ENST00000395996.1	vacuolar protein sorting 13 homolog B (yeast)	262	1	1	0	0	1	0	1	0	0	hsa-miR-491-5p	-0.27	-0.27
PIP4K2B	ENST00000269554.3	phosphatidylinositol-5-phosphate 4-kinase, type II, beta	148	1	0	1	0	0	0	0	0	3	hsa-miR-491-5p	-0.26	-0.38
RGMB	ENST00000308234.7	RGM domain family, member B	6087	1	1	0	0	0	0	0	0	0	hsa-miR-491-5p	-0.26	-0.33
RNF207	ENST00000377948.2	ring finger protein 207	5	1	1	0	0	0	0	0	0	0	hsa-miR-491-5p	-0.26	-0.26
POC1B-GALNT4	ENST00000547474.1	POC1B-GALNT4 readthrough	275	1	0	0	1	0	0	0	0	0	hsa-miR-491-5p	-0.26	-0.26
PADI2	ENST00000375486.4	peptidyl arginine deiminase, type II	11	1	0	1	0	2	0	2	0	1	hsa-miR-491-5p	-0.25	-0.62
MOCS1	ENST00000373186.4	molybdenum cofactor synthesis 1	179	1	0	1	0	0	0	0	0	1	hsa-miR-491-5p	-0.24	-0.24
PDGFRA	ENST00000257290.5	platelet-derived growth factor receptor, alpha polypeptide	39	1	1	0	0	0	0	0	0	0	hsa-miR-491-5p	-0.24	-0.24
RPUSD1	ENST00000565809.1	RNA pseudouridylate synthase domain containing 1	1360	2	0	1	1	0	0	0	0	0	hsa-miR-491-5p	-0.24	-0.24
BCL2L2	ENST00000250405.5	BCL2-like 2	1380	1	0	1	0	0	0	0	0	1	hsa-miR-491-5p	-0.24	-0.3
PRR3	ENST00000376560.3	proline rich 3	1145	1	0	1	0	0	0	0	0	0	hsa-miR-491-5p	-0.24	-0.24
CFL2	ENST00000341223.3	cofilin 2 (muscle)	902	1	0	1	0	0	0	0	0	0	hsa-miR-491-5p	-0.24	-0.25
RSBN1	ENST00000261441.5	round spermatid basic protein 1	54	1	1	0	0	0	0	0	0	0	hsa-miR-491-5p	-0.23	-0.23
LRRC4B	ENST00000599957.1	leucine rich repeat containing 4B	5	1	0	0	1	0	0	0	0	2	hsa-miR-491-5p	-0.23	-0.23
TEX261	ENST00000272438.4	testis expressed 261	359	1	0	1	0	0	0	0	0	1	hsa-miR-491-5p	-0.23	-0.25
GDAP2	ENST00000369443.5	ganglioside induced differentiation associated protein 2	656	1	0	1	0	1	1	0	0	1	hsa-miR-491-5p	-0.23	-0.31
DLGAP3	ENST00000373347.1	discs, large (Drosophila) homolog-associated protein 3	8	1	0	1	0	0	0	0	0	4	hsa-miR-491-5p	-0.23	-0.23
STK4	ENST00000372801.1	serine/threonine kinase 4	276	1	0	1	0	0	0	0	0	1	hsa-miR-491-5p	-0.23	-0.24
MAPK8IP3	ENST00000250894.4	mitogen-activated protein kinase 8 interacting protein 3	100	1	0	1	0	2	0	1	1	0	hsa-miR-491-5p	-0.23	-0.23
HIPK3	ENST00000303296.4	homeodomain interacting protein kinase 3	933	1	1	0	0	0	0	0	0	0	hsa-miR-491-5p	-0.23	-0.25
POGK	ENST00000367875.1	pogo transposable element with KRAB domain	377	1	1	0	0	1	1	0	0	1	hsa-miR-491-5p	-0.23	-0.25
EFNA3	ENST00000505139.1	Ephrin-A3; Uncharacterized protein; cDNA FLJ57652, highly similar to Ephrin-A3	9	1	0	1	0	1	0	0	1	2	hsa-miR-491-5p	-0.22	-0.44
IL1RAPL1	ENST00000378993.1	interleukin 1 receptor accessory protein-like 1	5	1	0	1	0	0	0	0	0	1	hsa-miR-491-5p	-0.22	-0.22
GRAMD1B	ENST00000529750.1	GRAM domain containing 1B	35	1	1	0	0	3	0	2	1	1	hsa-miR-491-5p	-0.22	-0.34
DYRK1B	ENST00000593685.1	dual-specificity tyrosine-(Y)-phosphorylation regulated kinase 1B	7	1	0	1	0	1	0	1	0	0	hsa-miR-491-5p	-0.22	-0.34
IMPG1	ENST00000369963.3	interphotoreceptor matrix proteoglycan 1	5	1	0	1	0	0	0	0	0	1	hsa-miR-491-5p	-0.22	-0.22
TLN1	ENST00000314888.9	talin 1	266	1	1	0	0	0	0	0	0	1	hsa-miR-491-5p	-0.22	-0.22
ARHGAP9	ENST00000550288.1	Rho GTPase activating protein 9	29	1	0	0	1	0	0	0	0	0	hsa-miR-491-5p	-0.22	-0.22
RORB	ENST00000376896.3	RAR-related orphan receptor B	5	1	1	0	0	1	0	0	1	0	hsa-miR-491-5p	-0.21	-0.21
PGBD5	ENST00000391860.1	piggyBac transposable element derived 5	20	1	1	0	0	0	0	0	0	1	hsa-miR-491-5p	-0.2	-0.27
MN1	ENST00000302326.4	meningioma (disrupted in balanced translocation) 1	15	1	0	1	0	0	0	0	0	4	hsa-miR-491-5p	-0.2	-0.2
CDYL2	ENST00000570137.2	chromodomain protein, Y-like 2	239	1	0	1	0	0	0	0	0	1	hsa-miR-491-5p	-0.2	-0.2
RUNDC1	ENST00000361677.1	RUN domain containing 1	927	1	1	0	0	2	0	2	0	0	hsa-miR-491-5p	-0.2	-0.54
TSNARE1	ENST00000519651.1	t-SNARE domain containing 1	11	1	0	1	0	0	0	0	0	1	hsa-miR-491-5p	-0.2	-0.2
PDE1B	ENST00000243052.3	phosphodiesterase 1B, calmodulin-dependent	6	1	0	1	0	0	0	0	0	3	hsa-miR-491-5p	-0.2	-0.2
AL354993.1	ENST00000439873.2	Cell growth-inhibiting protein 7; HCG1784586; Uncharacterized protein	9	1	1	0	0	0	0	0	0	0	hsa-miR-491-5p	-0.2	-0.48
MED29	ENST00000315588.5	mediator complex subunit 29	2453	1	1	0	0	0	0	0	0	4	hsa-miR-491-5p	-0.2	-0.42
ZBTB10	ENST00000430430.1	zinc finger and BTB domain containing 10	113	1	1	0	0	0	0	0	0	0	hsa-miR-491-5p	-0.2	-0.2
FAM126B	ENST00000418596.3	family with sequence similarity 126, member B	132	1	1	0	0	0	0	0	0	0	hsa-miR-491-5p	-0.2	-0.2
DMWD	ENST00000377735.3	dystrophia myotonica, WD repeat containing	229	1	0	1	0	0	0	0	0	3	hsa-miR-491-5p	-0.19	-0.37
ACVRL1	ENST00000550683.1	activin A receptor type II-like 1	68	1	0	1	0	1	0	0	1	2	hsa-miR-491-5p	-0.19	-0.32
SRGAP3	ENST00000383836.3	SLIT-ROBO Rho GTPase activating protein 3	38	1	1	0	0	4	0	3	1	1	hsa-miR-491-5p	-0.19	-0.56
STK40	ENST00000359297.2	serine/threonine kinase 40	214	1	1	0	0	0	0	0	0	1	hsa-miR-491-5p	-0.18	-0.21
PPP6C	ENST00000373547.4	protein phosphatase 6, catalytic subunit	346	1	0	1	0	0	0	0	0	0	hsa-miR-491-5p	-0.18	-0.19
AC074091.13	ENST00000379677.2	Uncharacterized protein	5	1	0	1	0	0	0	0	0	1	hsa-miR-491-5p	-0.18	-0.18
PAPOLG	ENST00000238714.3	poly(A) polymerase gamma	49	1	0	0	1	0	0	0	0	0	hsa-miR-491-5p	-0.17	-0.18
SMTNL2	ENST00000338859.4	smoothelin-like 2	23	1	0	0	1	1	0	1	0	0	hsa-miR-491-5p	-0.17	-0.3
CHD3	ENST00000380358.4	chromodomain helicase DNA binding protein 3	700	1	0	1	0	1	0	1	0	1	hsa-miR-491-5p	-0.17	-0.24
BNC2	ENST00000380672.4	basonuclin 2	770	1	1	0	0	0	0	0	0	0	hsa-miR-491-5p	-0.17	-0.17
FAM173A	ENST00000564000.1	family with sequence similarity 173, member A	259	1	0	1	0	0	0	0	0	0	hsa-miR-491-5p	-0.16	-0.16
DNAJA2	ENST00000317089.5	DnaJ (Hsp40) homolog, subfamily A, member 2	1487	1	1	0	0	0	0	0	0	0	hsa-miR-491-5p	-0.15	-0.44
ZNF644	ENST00000370440.1	zinc finger protein 644	40	1	1	0	0	0	0	0	0	0	hsa-miR-491-5p	-0.14	-0.41
FAF1	ENST00000396153.2	Fas (TNFRSF6) associated factor 1	428	1	1	0	0	1	1	0	0	0	hsa-miR-491-5p	-0.14	-0.37
PSD4	ENST00000441564.3	pleckstrin and Sec7 domain containing 4	72	1	1	0	0	2	0	2	0	2	hsa-miR-491-5p	-0.14	-0.43
CSMD2	ENST00000373381.4	CUB and Sushi multiple domains 2	5	1	1	0	0	1	0	0	1	1	hsa-miR-491-5p	-0.13	-0.13
POFUT1	ENST00000375749.3	protein O-fucosyltransferase 1	647	1	0	1	0	0	0	0	0	0	hsa-miR-491-5p	-0.12	-0.14
TRIOBP	ENST00000406386.3	TRIO and F-actin binding protein	1545	1	0	1	0	2	0	1	1	2	hsa-miR-491-5p	-0.12	-0.14
NUP98	ENST00000359171.4	nucleoporin 98kDa	371	1	1	0	0	0	0	0	0	0	hsa-miR-491-5p	-0.11	-0.11
SRCAP	ENST00000262518.4	Snf2-related CREBBP activator protein	643	2	0	1	1	0	0	0	0	4	hsa-miR-491-5p	-0.1	-0.13
PTPN11	ENST00000351677.2	protein tyrosine phosphatase, non-receptor type 11	52	1	0	1	0	0	0	0	0	2	hsa-miR-491-5p	-0.1	-0.14
HSD17B8	ENST00000374662.3	hydroxysteroid (17-beta) dehydrogenase 8	51	1	0	1	0	0	0	0	0	4	hsa-miR-491-5p	-0.1	-0.47
CSRNP3	ENST00000314499.7	cysteine-serine-rich nuclear protein 3	24	1	0	1	0	1	1	0	0	0	hsa-miR-491-5p	-0.1	-0.1
CDC6	ENST00000209728.4	cell division cycle 6	772	1	0	1	0	0	0	0	0	2	hsa-miR-491-5p	-0.09	-0.13
ERN1	ENST00000433197.3	endoplasmic reticulum to nucleus signaling 1	182	1	0	1	0	0	0	0	0	2	hsa-miR-491-5p	-0.09	-0.09
RPS14	ENST00000401695.3	ribosomal protein S14	2353	1	0	0	1	1	0	0	1	0	hsa-miR-491-5p	-0.08	-0.52
IKZF3	ENST00000346872.3	IKAROS family zinc finger 3 (Aiolos)	7	1	1	0	0	0	0	0	0	6	hsa-miR-491-5p	-0.08	-0.29
PAPLN	ENST00000381166.3	papilin, proteoglycan-like sulfated glycoprotein	78	1	1	0	0	0	0	0	0	2	hsa-miR-491-5p	-0.08	-0.31
RPRD2	ENST00000539519.1	regulation of nuclear pre-mRNA domain containing 2	280	1	1	0	0	0	0	0	0	7	hsa-miR-491-5p	-0.08	-0.22
KDM5B	ENST00000367265.3	lysine (K)-specific demethylase 5B	187	1	1	0	0	1	0	1	0	0	hsa-miR-491-5p	-0.07	-0.49
GCNT4	ENST00000322348.4	glucosaminyl (N-acetyl) transferase 4, core 2	19	1	1	0	0	0	0	0	0	1	hsa-miR-491-5p	-0.07	-0.29
SZRD1	ENST00000401089.3	SUZ RNA binding domain containing 1	137	1	0	1	0	0	0	0	0	3	hsa-miR-491-5p	-0.06	-0.15
APPBP2	ENST00000083182.3	amyloid beta precursor protein (cytoplasmic tail) binding protein 2	907	1	0	1	0	0	0	0	0	1	hsa-miR-491-5p	-0.06	-0.25
PTGS1	ENST00000362012.2	prostaglandin-endoperoxide synthase 1 (prostaglandin G/H synthase and cyclooxygenase)	399	1	1	0	0	0	0	0	0	1	hsa-miR-491-5p	-0.05	-0.21
N4BP3	ENST00000274605.5	NEDD4 binding protein 3	35	1	0	1	0	3	0	1	2	4	hsa-miR-491-5p	-0.05	-0.36
DIS3	ENST00000377767.4	DIS3 mitotic control homolog (S. cerevisiae)	140	1	1	0	0	0	0	0	0	2	hsa-miR-491-5p	-0.03	-0.31
PPARGC1B	ENST00000309241.5	peroxisome proliferator-activated receptor gamma, coactivator 1 beta	12	1	0	1	0	0	0	0	0	1	hsa-miR-491-5p	-0.02	-0.03
RTF1	ENST00000389629.4	Rtf1, Paf1/RNA polymerase II complex component, homolog (S. cerevisiae)	1869	1	1	0	0	0	0	0	0	2	hsa-miR-491-5p	-0.02	-0.25
PSMB5	ENST00000493471.2	proteasome (prosome, macropain) subunit, beta type, 5	156	1	0	1	0	0	0	0	0	0	hsa-miR-491-5p	-0.02	-0.15
DDHD1	ENST00000323669.5	DDHD domain containing 1	103	1	0	1	0	1	1	0	0	2	hsa-miR-491-5p	-0.01	-0.1
ISCA2	ENST00000554924.1	iron-sulfur cluster assembly 2	135	1	1	0	0	0	0	0	0	0	hsa-miR-491-5p	-0.01	-0.33
MRPL17	ENST00000288937.6	mitochondrial ribosomal protein L17	1447	1	1	0	0	1	1	0	0	0	hsa-miR-491-5p	-0.01	-0.3
DGCR14	ENST00000252137.6	DiGeorge syndrome critical region gene 14	269	1	0	1	0	2	1	0	1	1	hsa-miR-491-5p	-0.01	-0.29
CAPN7	ENST00000253693.2	calpain 7	76	1	0	1	0	1	0	0	1	1	hsa-miR-491-5p	0	-0.23
GTF2F1	ENST00000394456.5	general transcription factor IIF, polypeptide 1, 74kDa	1014	1	0	1	0	0	0	0	0	3	hsa-miR-491-5p	0	-0.16
ZBTB20	ENST00000462705.1	zinc finger and BTB domain containing 20	5	1	1	0	0	2	1	1	0	2	hsa-miR-491-5p	0	-0.2
C10orf71	ENST00000323868.4	chromosome 10 open reading frame 71	5	1	1	0	0	0	0	0	0	0	hsa-miR-491-5p	0	-0.09
MYO1F	ENST00000338257.8	myosin IF	33	1	0	0	1	0	0	0	0	0	hsa-miR-491-5p	0	-0.13
